# Supplementary material for: An acid-stable positively charged polysulfonamide nanofiltration membrane prepared by interfacial polymerization of polyallylamine and 1,3-benzenedisulfonyl chloride for water treatment
Source: Royal Society of Chemistry journal article supplement (doi:10.1039/c8ra08369j), 2019-01-01
Supplement: c8ra08369j1.pdf [file c8ra08369j1.pdf]

## Supporting information

### **An acid stable positively charged polysulfonamide nanofiltration membranes prepared by interfacial polymerization of polyallylamine and 1, 3-benzenedisulfonyl chloride for water treatment**

Hao Wang <sup>a</sup>, Zhong Wei <sup>a,b,c,d</sup> \*, Heyun Wang <sup>a,c,d</sup> \*, Haoji Jiang <sup>a</sup>, Yinchun Li <sup>a</sup>,  
Chunlin Wu <sup>a</sup>

<sup>a</sup>School of Chemistry and Chemical Engineering, Shihezi University, Shihezi 832003, China

<sup>b</sup>Key Laboratory for Green Processing of Chemical Engineering of Xinjiang bingtuan, Shihezi University, Shihezi 832003, China

<sup>c</sup>Key Laboratory of Materials-Oriented Chemical Engineering of Xinjiang Uygur Autonomous Region

<sup>d</sup>Engineering Research Center of Materials-Oriented Chemical Engineering of Xinjiang Uygur Autonomous Region

\*Corresponding author.

Tel.: +86 17799434147,

Fax: +86-0993-2057272,

E-mail address: [steven\\_weiz@sina.com](mailto:steven_weiz@sina.com)

E-mail address: [whyun@shzu.edu.cn](mailto:whyun@shzu.edu.cn)

**1** The separation performance data of all membranes (along with statistical variance and average)

Where R, F, S<sup>2</sup>, and A represent the rejection (%), the permeation flux (L/m<sup>2</sup> h), the statistical variance, and average, respectively.

**Table 1** Effect of the pH value of PAH aqueous solution on the separation performance of the PSA composite membrane evaluated with 1 g/L NaCl solution.

| pH   | Sample (R) |       |       |       |                |       | Sample (F) |       |       |       |                |       |
|------|------------|-------|-------|-------|----------------|-------|------------|-------|-------|-------|----------------|-------|
|      | 1          | 2     | 3     | 4     | S <sup>2</sup> | A     | 1          | 2     | 3     | 4     | S <sup>2</sup> | A     |
| 8.5  | 18.45      | 18.32 | 17.17 | 17.30 | 0.45           | 17.81 | 60.97      | 61.54 | 62.67 | 62.10 | 0.53           | 61.82 |
| 9    | 32.71      | 32.11 | 33.75 | 33.15 | 0.48           | 32.93 | 49.10      | 49.71 | 48.13 | 48.78 | 0.43           | 48.94 |
| 9.33 | 55.19      | 56.69 | 55.98 | 55.9  | 0.38           | 55.94 | 34.73      | 32.91 | 33.54 | 34.1  | 0.60           | 33.82 |
| 9.5  | 47.79      | 49.37 | 48.60 | 48.40 | 0.42           | 48.58 | 36.48      | 34.98 | 34.84 | 35.42 | 0.55           | 35.13 |
| 9.7  | 41.49      | 43.15 | 42.83 | 41.81 | 0.63           | 42.32 | 40.49      | 38.73 | 39.12 | 40.11 | 0.68           | 39.61 |

**Table 2** Effect of the PAH aqueous solution soaking time on the separation performance of the PSA composite membrane evaluated with 1 g/L NaCl solution.

| Time(min ) | Sample (R) |       |       |       |                |       | Sample (F) |       |       |       |                |       |
|------------|------------|-------|-------|-------|----------------|-------|------------|-------|-------|-------|----------------|-------|
|            | 1          | 2     | 3     | 4     | S <sup>2</sup> | A     | 1          | 2     | 3     | 4     | S <sup>2</sup> | A     |
| 5          | 31.39      | 32.87 | 32.16 | 32.10 | 0.37           | 32.13 | 53.98      | 52.3  | 52.98 | 53.3  | 0.49           | 53.14 |
| 10         | 43.92      | 42.56 | 42.98 | 43.6  | 0.37           | 43.24 | 42.34      | 44.18 | 43.70 | 42.72 | 0.54           | 43.21 |
| 15         | 49.98      | 51.48 | 50.23 | 51.23 | 0.54           | 50.73 | 39.06      | 37.2  | 38.37 | 37.89 | 0.62           | 38.13 |
| 25         | 56.09      | 57.55 | 56.93 | 56.71 | 0.36           | 56.82 | 35.09      | 33.33 | 34.08 | 34.34 | 0.52           | 34.21 |
| 60         | 55.19      | 56.69 | 55.98 | 55.9  | 0.38           | 55.94 | 34.73      | 32.91 | 33.54 | 34.1  | 0.60           | 33.82 |

**Table 3** Effect of reaction time on the separation performance of the PSA composite membrane evaluated with 1 g/L NaCl aqueous solution.

| Time(min ) | Sample (R) |       |       |       |                |       | Sample (F) |       |       |       |                |       |
|------------|------------|-------|-------|-------|----------------|-------|------------|-------|-------|-------|----------------|-------|
|            | 1          | 2     | 3     | 4     | S <sup>2</sup> | A     | 1          | 2     | 3     | 4     | S <sup>2</sup> | A     |
| 5          | 27.34      | 26.9  | 28.38 | 27.94 | 0.43           | 27.64 | 56.5       | 57.09 | 55.35 | 55.94 | 0.56           | 56.22 |
| 15         | 47.91      | 49.55 | 48.26 | 49.2  | 0.60           | 48.73 | 42.08      | 43.8  | 43.08 | 42.8  | 0.50           | 42.94 |
| 20         | 56.09      | 57.55 | 56.93 | 56.71 | 0.36           | 56.82 | 35.09      | 33.33 | 34.08 | 34.34 | 0.53           | 34.21 |
| 30         | 55.32      | 56.92 | 55.8  | 56.44 | 0.50           | 56.12 | 31.77      | 30.03 | 31.21 | 30.59 | 0.57           | 30.9  |

**Table 4** Effect of PAH and BDSC concentrations on the separation performance of the PSA composite membrane evaluated with 1 g/L MgCl<sub>2</sub> solution.

| Membrane | Sample (R) |       |       |       |                |       | Sample (F) |       |       |       |                |       |
|----------|------------|-------|-------|-------|----------------|-------|------------|-------|-------|-------|----------------|-------|
|          | 1          | 2     | 3     | 4     | S <sup>2</sup> | A     | 1          | 2     | 3     | 4     | S <sup>2</sup> | A     |
| NF1      | 65.11      | 66.39 | 66.22 | 65.28 | 0.42           | 65.75 | 52.67      | 50.83 | 51.19 | 52.31 | 0.77           | 51.75 |
| NF2      | 70.77      | 69.25 | 70.31 | 69.71 | 0.45           | 70.01 | 44.36      | 46.26 | 44.96 | 45.66 | 0.68           | 45.31 |
| NF3      | 73.22      | 71.76 | 72.12 | 72.86 | 0.45           | 72.49 | 41.31      | 43.09 | 42.64 | 41.76 | 0.66           | 42.2  |
| NF4      | 53.65      | 52.51 | 53.19 | 52.97 | 0.22           | 53.08 | 55.75      | 57.47 | 56.26 | 56.96 | 0.57           | 56.61 |
| NF5      | 81.12      | 79.8  | 80.78 | 80.14 | 0.36           | 80.46 | 38.5       | 40.38 | 39.02 | 39.86 | 0.71           | 39.44 |
| NF6      | 91.61      | 93.27 | 92.78 | 92.1  | 0.54           | 92.44 | 35.03      | 33.21 | 33.98 | 34.26 | 0.57           | 34.10 |
| NF7      | 91.8       | 90.61 | 91.63 | 90.77 | 0.36           | 91.20 | 30.41      | 32.19 | 30.73 | 31.87 | 0.74           | 31.30 |

**Table 5** Rejection and permeation flux of the NF6 membrane for different salts evaluated.

| Salt type<br>(1g/L)             | Sample (R) |       |       |       |                |       | Sample (F) |       |       |       |                |       |
|---------------------------------|------------|-------|-------|-------|----------------|-------|------------|-------|-------|-------|----------------|-------|
|                                 | 1          | 2     | 3     | 4     | S <sup>2</sup> | A     | 1          | 2     | 3     | 4     | S <sup>2</sup> | A     |
| MgCl <sub>2</sub>               | 91.61      | 93.27 | 92.78 | 92.1  | 0.54           | 92.44 | 35.03      | 33.21 | 33.98 | 34.26 | 0.57           | 34.10 |
| MgSO <sub>4</sub>               | 89.84      | 88.73 | 89.23 | 88.12 | 0.53           | 88.98 | 33.79      | 35.11 | 34.35 | 35.67 | 0.68           | 34.73 |
| NaCl                            | 56.09      | 57.55 | 56.93 | 56.71 | 0.36           | 56.82 | 35.09      | 33.33 | 34.08 | 34.34 | 0.53           | 34.21 |
| Na <sub>2</sub> SO <sub>4</sub> | 54.31      | 55.91 | 55.16 | 55.06 | 0.43           | 55.11 | 36.1       | 34.34 | 35.18 | 35.26 | 0.52           | 35.22 |

**Table 6** Effect of MgCl<sub>2</sub> solution feed concentration on the NF6 membrane performance.

| MgCl <sub>2</sub> (g/L) | Sample (R) |       |       |       |                |       | Sample (F) |       |       |       |                |       |
|-------------------------|------------|-------|-------|-------|----------------|-------|------------|-------|-------|-------|----------------|-------|
|                         | 1          | 2     | 3     | 4     | S <sup>2</sup> | A     | 1          | 2     | 3     | 4     | S <sup>2</sup> | A     |
| 0.1                     | 93.05      | 92.30 | 90.63 | 91.38 | 1.11           | 91.84 | 38.52      | 38.91 | 39.92 | 39.53 | 0.39           | 39.22 |
| 0.5                     | 91.03      | 93.05 | 92.78 | 91.30 | 1.04           | 92.04 | 36.1       | 35.17 | 35.31 | 35.95 | 0.21           | 35.63 |
| 1                       | 91.61      | 93.27 | 92.78 | 92.1  | 0.54           | 92.44 | 35.03      | 33.21 | 33.98 | 34.26 | 0.57           | 34.12 |
| 1.5                     | 91.56      | 92.21 | 92.09 | 91.71 | 0.09           | 91.9  | 33.96      | 33.28 | 33.4  | 33.84 | 0.11           | 33.62 |
| 2                       | 90.96      | 89.68 | 90.67 | 89.97 | 0.35           | 90.32 | 32.42      | 33.54 | 32.65 | 33.31 | 0.28           | 32.98 |
| 3                       | 89.6       | 88.48 | 89.42 | 88.66 | 0.31           | 89.04 | 30.91      | 33.31 | 31.25 | 32.97 | 1.45           | 32.11 |

**Table 7** Effect of MgCl<sub>2</sub> solution feed pH on separation performance for the NF6 membrane.

| pH | Sample (R) |       |       |       |                |       | Sample (F) |       |       |       |                |       |
|----|------------|-------|-------|-------|----------------|-------|------------|-------|-------|-------|----------------|-------|
|    | 1          | 2     | 3     | 4     | S <sup>2</sup> | A     | 1          | 2     | 3     | 4     | S <sup>2</sup> | A     |
| 3  | 93.89      | 94.35 | 94.23 | 94.01 | 0.04           | 94.12 | 33.72      | 32.5  | 32.66 | 33.56 | 0.38           | 33.11 |
| 4  | 94.14      | 93.64 | 94.07 | 93.71 | 0.06           | 93.89 | 33.03      | 34.19 | 33.28 | 33.94 | 0.30           | 33.61 |

|     |       |       |       |       |      |       |       |       |       |       |      |       |
|-----|-------|-------|-------|-------|------|-------|-------|-------|-------|-------|------|-------|
| 5   | 92.47 | 93.61 | 93.36 | 92.72 | 0.28 | 93.04 | 34.47 | 33.19 | 33.4  | 34.36 | 0.43 | 33.83 |
| 6.5 | 91.61 | 93.27 | 92.78 | 92.1  | 0.54 | 92.44 | 35.03 | 33.21 | 33.98 | 34.26 | 0.57 | 34.12 |
| 8   | 92.33 | 90.87 | 92.14 | 91.06 | 0.55 | 91.6  | 33.52 | 34.68 | 33.68 | 34.52 | 0.34 | 34.1  |
| 9   | 79.47 | 78.27 | 79.18 | 78.56 | 0.30 | 78.87 | 33.34 | 34.6  | 33.76 | 34.18 | 0.29 | 33.97 |
| 11  | 64.94 | 63.5  | 64.53 | 63.91 | 0.41 | 64.22 | 34.83 | 35.69 | 35    | 35.52 | 0.17 | 35.26 |

**Table 8** Separation performance of the NF6 membrane for heavy metal salts

| Salt type<br>(1g/L)               | Sample (R) |       |       |       |                |       | Sample (F) |       |       |       |                |       |
|-----------------------------------|------------|-------|-------|-------|----------------|-------|------------|-------|-------|-------|----------------|-------|
|                                   | 1          | 2     | 3     | 4     | S <sup>2</sup> | A     | 1          | 2     | 3     | 4     | S <sup>2</sup> | A     |
| ZnCl <sub>2</sub>                 | 94.54      | 95.92 | 95.42 | 95.04 | 0.34           | 95.23 | 34.34      | 33.06 | 33.33 | 34.07 | 0.36           | 33.70 |
| CuCl <sub>2</sub>                 | 93.75      | 92.66 | 94.18 | 93.09 | 0.46           | 93.42 | 33.52      | 34.77 | 33.03 | 34.38 | 0.63           | 33.90 |
| CdCl <sub>2</sub>                 | 90.64      | 91.76 | 90.98 | 91.42 | 0.24           | 91.20 | 34.71      | 33.55 | 34.58 | 33.68 | 0.36           | 34.13 |
| Pb(NO <sub>3</sub> ) <sub>2</sub> | 91.47      | 92.78 | 92.26 | 91.96 | 0.30           | 92.11 | 35.12      | 33.6  | 33.94 | 34.78 | 0.50           | 34.36 |

**Table 9** The separation performance of the NF6 membrane after expose to 20% (w/v)

H<sub>2</sub>SO<sub>4</sub> solutions for a fixed period was evaluated with 1 g/L MgCl<sub>2</sub> solution.

| Time(day<br>) | Sample (R) |       |       |       |                |       | Sample (F) |       |       |       |                |       |
|---------------|------------|-------|-------|-------|----------------|-------|------------|-------|-------|-------|----------------|-------|
|               | 1          | 2     | 3     | 4     | S <sup>2</sup> | A     | 1          | 2     | 3     | 4     | S <sup>2</sup> | A     |
| 0             | 91.61      | 93.27 | 92.78 | 92.1  | 0.54           | 92.44 | 35.03      | 33.21 | 33.98 | 34.26 | 0.57           | 34.12 |
| 3             | 93.72      | 91.88 | 93.25 | 92.35 | 0.70           | 92.8  | 34.47      | 36.37 | 34.66 | 36.18 | 0.99           | 35.42 |
| 8             | 92.46      | 90.76 | 92.14 | 91.08 | 0.67           | 91.61 | 35.52      | 37.18 | 35.72 | 36.98 | 0.72           | 36.35 |
| 13            | 90.86      | 88.98 | 90.33 | 89.51 | 0.70           | 89.92 | 36.45      | 38.37 | 36.88 | 37.94 | 0.80           | 37.41 |
| 18            | 89.64      | 88.16 | 89.21 | 88.59 | 0.43           | 88.9  | 36.8       | 38.84 | 37.45 | 38.19 | 0.78           | 37.82 |
| 21            | 89.44      | 87.78 | 88.09 | 89.13 | 0.64           | 88.61 | 37.5       | 39.36 | 39.14 | 37.72 | 0.91           | 38.43 |
| 26            | 87.77      | 89.67 | 88.33 | 89.11 | 0.70           | 88.72 | 39.47      | 37.73 | 39.21 | 38    | 0.75           | 38.6  |
| 30            | 89.2       | 87.44 | 88.96 | 87.68 | 0.79           | 88.32 | 37.92      | 39.5  | 38.22 | 39.2  | 0.58           | 38.71 |

**Table 10** The PEG rejection curve for the NF6 membrane tested.

| PEG(Mw) | Sample (R) |       |       |       |                |       |
|---------|------------|-------|-------|-------|----------------|-------|
|         | 1          | 2     | 3     | 4     | S <sup>2</sup> | A     |
| 200     | 79.23      | 77.99 | 78.92 | 78.3  | 0.32           | 78.61 |
| 400     | 86.05      | 84.61 | 85.96 | 84.7  | 0.61           | 85.33 |
| 800     | 92.78      | 91.7  | 92.13 | 92.35 | 0.20           | 92.24 |
| 2000    | 98         | 96.44 | 97.62 | 96.82 | 0.51           | 97.22 |
| 4000    | 99.78      | 98.9  | 99.21 | 99.47 | 0.14           | 99.34 |
| 6000    | 100        | 100   | 100   | 100   | -              | 100   |
| 10000   | 100        | 100   | 100   | 100   | -              | 100   |

## 2 The various parameter data ( $\Delta P$ , $P$ , $\pi$ , $M$ , $i$ , $R$ and $T$ ) of all solutes

$$\Delta P = P - \pi = P - (i\Delta MRT)$$

$$1\text{MPa} = 1\text{bar}$$

$$R = \left(1 - \frac{C_p}{C_f}\right) \times 100\%$$

$$\Delta M = \frac{C_f - C_p}{M}$$

Where  $\Delta P$ ,  $P$ ,  $\pi$  represent the effective trans-membrane pressure, the practical pressure (MPa), the osmotic pressure, respectively.  $\Delta M$ ,  $i$ ,  $R$  and  $T$  represent the molar concentration difference of the solute between feed and permeate (mol/L), the Van't Hoff factor for the relevant solute, the common gas constant ( $0.08314 \text{ L bar mol}^{-1} \text{ K}^{-1}$ ), the absolute temperature (K), respectively.  $R$ ,  $C_f$ ,  $C_p$  and  $M$  represent the solute rejection (%), the solute concentrations (g/L) for feed solutions, the solute concentrations (g/L) for permeate and the molar mass of solute, respectively.

**Table 11** The various parameter data for different inorganic salts.

| Solute<br>(1g/L)                  | M<br>(g/mol) | $\Delta P$<br>(MPa) | P<br>(MPa) | $\pi$<br>(MPa) | $\Delta M$ (mol/L) | i | R (L bar mol <sup>-1</sup><br>K <sup>-1</sup> ) | T (K)  |
|-----------------------------------|--------------|---------------------|------------|----------------|--------------------|---|-------------------------------------------------|--------|
| MgCl <sub>2</sub>                 | 95.31        | 0.4279              | 0.5        | 0.0721         | 0.009694           | 3 | 0.08314                                         | 298.15 |
| MgSO <sub>4</sub>                 | 120.36       | 0.4634              | 0.5        | 0.0366         | 0.007386           | 2 | 0.08314                                         | 298.15 |
| NaCl                              | 58.44        | 0.4518              | 0.5        | 0.0482         | 0.009719           | 2 | 0.08314                                         | 298.15 |
| Na <sub>2</sub> SO <sub>4</sub>   | 142.04       | 0.4711              | 0.5        | 0.0289         | 0.003886           | 3 | 0.08314                                         | 298.15 |
| ZnCl <sub>2</sub>                 | 136.30       | 0.4481              | 0.5        | 0.0519         | 0.006985           | 3 | 0.08314                                         | 298.15 |
| CuCl <sub>2</sub>                 | 134.45       | 0.4483              | 0.5        | 0.0517         | 0.006947           | 3 | 0.08314                                         | 298.15 |
| CdCl <sub>2</sub>                 | 183.32       | 0.4630              | 0.5        | 0.037          | 0.004975           | 3 | 0.08314                                         | 298.15 |
| Pb(NO <sub>3</sub> ) <sub>2</sub> | 331.23       | 0.4793              | 0.5        | 0.0207         | 0.002781           | 3 | 0.08314                                         | 298.15 |

**Table 12** The various parameter data for MgCl<sub>2</sub> with different concentrations.

| MgCl <sub>2</sub><br>(g/L) | M<br>(g/mol) | $\Delta P$<br>(MPa) | P<br>(MPa) | $\pi$<br>(MPa) | $\Delta M$ (mol/L) | i | R (L bar mol <sup>-1</sup><br>K <sup>-1</sup> ) | T (K)  |
|----------------------------|--------------|---------------------|------------|----------------|--------------------|---|-------------------------------------------------|--------|
| 0.1                        | 95.31        | 0.4928              | 0.5        | 0.0072         | 0.000963           | 3 | 0.08314                                         | 298.15 |
| 0.5                        | 95.31        | 0.4641              | 0.5        | 0.0359         | 0.004828           | 3 | 0.08314                                         | 298.15 |
| 1                          | 95.31        | 0.4279              | 0.5        | 0.0721         | 0.009694           | 3 | 0.08314                                         | 298.15 |
| 1.5                        | 95.31        | 0.3924              | 0.5        | 0.1076         | 0.014463           | 3 | 0.08314                                         | 298.15 |
| 2                          | 95.31        | 0.3591              | 0.5        | 0.1409         | 0.018949           | 3 | 0.08314                                         | 298.15 |
| 3                          | 95.31        | 0.2917              | 0.5        | 0.2083         | 0.028014           | 3 | 0.08314                                         | 298.15 |

**Table 13** The various parameter data for PEG with different molecular weights.

| PEG (g/L) | Mw(g/mo<br>l) | $\Delta P$<br>(MPa) | P<br>(MPa) | $\pi$ (MPa) | $\Delta M$ (mol/L) | i | R (L bar mol <sup>-1</sup><br>K <sup>-1</sup> ) | T (K)  |
|-----------|---------------|---------------------|------------|-------------|--------------------|---|-------------------------------------------------|--------|
| 0.05      | 200           | 0.49951             | 0.5        | 0.00049     | 0.000197           | 1 | 0.08314                                         | 298.15 |
| 0.05      | 400           | 0.49973             | 0.5        | 0.00027     | 0.000107           | 1 | 0.08314                                         | 298.15 |
| 0.05      | 800           | 0.49986             | 0.5        | 0.00014     | 0.000058           | 1 | 0.08314                                         | 298.15 |
| 0.05      | 2000          | 0.49994             | 0.5        | 0.00006     | 0.000024           | 1 | 0.08314                                         | 298.15 |
| 0.05      | 4000          | 0.49997             | 0.5        | 0.00003     | 0.000012           | 1 | 0.08314                                         | 298.15 |
| 0.05      | 6000          | 0.49998             | 0.5        | 0.00002     | 0.000008           | 1 | 0.08314                                         | 298.15 |
| 0.05      | 10000         | 0.49999             | 0.5        | 0.00001     | 0.000005           | 1 | 0.08314                                         | 298.15 |
